# Supplementary material for: Controlled release and characterisation of photocaged molecules using in situ LED illumination in solution NMR spectroscopy
Source: Royal Society of Chemistry journal article supplement (doi:10.1039/d2cc04731d), 2022-01-01
Supplement: d2cc04731d1.pdf [file d2cc04731d1.pdf]

## Supplementary Information

### Controlled release and characterisation of photocaged molecules using in situ LED illumination in solution NMR spectroscopy

Jack E. Bramham,<sup>a</sup> Matja Zalar<sup>b</sup> and Alexander P. Golovanov<sup>a\*</sup>

<sup>a</sup> Department of Chemistry, School of Natural Sciences, Faculty of Science and Engineering, The University of Manchester, Manchester, M13 9PL, United Kingdom

<sup>b</sup> Department of Chemical Engineering, School of Natural Sciences, Faculty of Science and Engineering, The University of Manchester, Manchester, M13 9PL, UK

\* Send Correspondence to [a.golovanov@manchester.ac.uk](mailto:a.golovanov@manchester.ac.uk)

#### Table of Contents:

**Materials and Methods. (S-2)**

**Figure S1. <sup>1</sup>H NMR spectra of NPE-ATP before and after 40 s illumination. (S-3)**

**Figure S2. Assessment of the uncaging of ATP by <sup>1</sup>H-decoupled <sup>31</sup>P NMR spectroscopy. (S-3)**

**Figure S3. Growth of acetyl phosphate methyl signal in <sup>1</sup>H NMR following ATP release. (S-4)**

**Supplementary References. (S-4)**

## Materials and Methods

**Sample Preparation:** Adenosine 5'-triphosphate, P3-(1-(2-nitrophenyl)ethyl) ester, disodium salt (NPE caged-ATP, ThermoFisher Scientific, A1048) was prepared as a 10 mM stock in  $^2\text{H}_2\text{O}$  (99.9%, Sigma-Aldrich), aliquoted, and frozen at  $-20^\circ\text{C}$ . For NMR samples, NPE caged-ATP aliquots were defrosted immediately before use, and added to a final concentration of 1 mM (and thus adding 10%  $^2\text{H}_2\text{O}$  required for NMR field-frequency lock). All experiments were conducted in 100 mM Tris buffer, pH 7.6 (Tris base and HCl, both Sigma-Aldrich), with 200 mM sodium acetate (Sigma-Aldrich, S2889), 5 mM  $\text{MgCl}_2$  (Fisher, 10647032), 1 mM NPE caged-ATP and 10%  $^2\text{H}_2\text{O}$ . Acetate kinase (lyophilised powder from *Escherichia coli*, Sigma-Aldrich, A7437) was prepared fresh in buffer as a 100 U/ml stock, and used at 2 U/ml final concentration in NMR experiments.

**NMR spectroscopy:**  $^1\text{H}$  NMR experiments were performed using a Bruker 500 MHz Avance III spectrometer with a QCI-F cryoprobe with cooled  $^1\text{H}$  channel and sample temperature control. NMR samples were placed in 5 mm quartz NMRtorch tubes prepared as described earlier,<sup>1</sup> and sealed with transparent caps made from quartz rods. *In situ* illumination was conducted using an NMRtorch equipped with a single array of 4x365 nm LEDs (LZ4-V4UV0R from LED Engin, nominal power 10W), with illumination duration controlled by the NMR console and transistor-transistor logic (TTL) triggers (see Bramham & Golovanov, 2022<sup>1</sup> for more details about the NMRtorch approach).  $^1\text{H}$  NMR experiments (2 dummy scans, 8 scans, 6 s effective relaxation delay) were recorded at  $25^\circ\text{C}$  using the excitation sculpting water suppression pulse sequence (zgesgp), modified as needed to be acquired in a pseudo-2D time-resolved fashion and with pulse sequence control of illumination triggering and duration.  $^1\text{H}$  decoupled  $^{31}\text{P}$  NMR spectra were acquired using a Bruker 400 MHz spectrometer with broadband probe and the zgpg30 pulse sequence (1k scans).

**NPE caged-ATP photolysis:** Initial calibration of the photorelease was performed by repeated cycles of 1 s illumination with a 1D  $^1\text{H}$  NMR spectra recorded after each illumination. The resulting calibration curve was fit to the exponential equation:

$$[\text{Free ATP}]_T = [\text{Free ATP}]_{\text{maximum}} \times (1 - e^{-kT})$$

where  $k$  is the rate constant, and  $T$  is total illumination time at given time point. Thus, the illumination time required to release a given amount of ATP from photocaged can be determined. For the titration experiments, illumination durations used were 0.85, 0.96, 1.08, 1.25, 1.47, 1.8, 2.31, 3.24, and 5.46 s in sequential order.

**Data processing and analysis:** NMR spectra were initially processed and analysed using Topspin 4.1 and Dynamics Centre 2.7 (both Bruker), with spectral deconvolution performed using SpinWorks (University of Manitoba). Graphs were plotted using Prism 9 (GraphPad), and figures prepared using CorelDRAW 2020 (Corel).

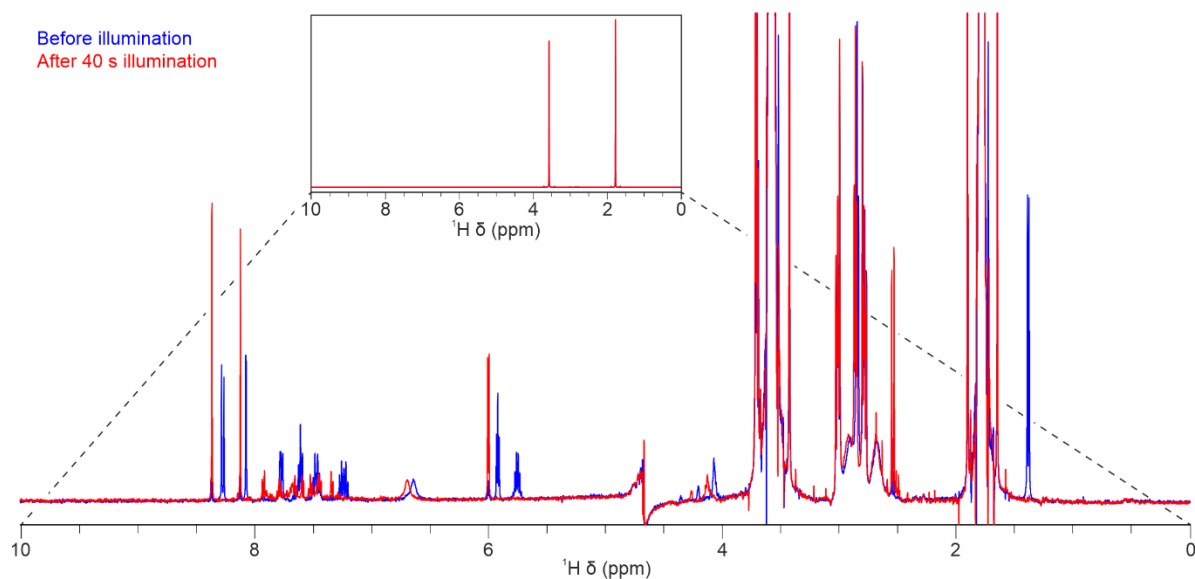

**Figure S1.  $^1\text{H}$  NMR spectra of NPE-ATP before and after 40 s illumination.** The characteristic signals in the spectrum are strongly affected by illumination. The inset shows that the spectrum as a whole is dominated by high concentration Tris buffer (~3.6 ppm) and acetate (~1.8 ppm) signals.

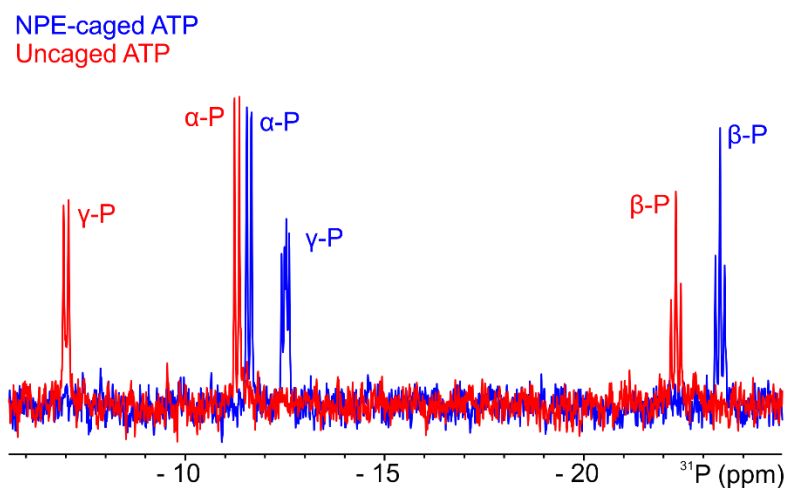

**Figure S2. Assessment of the uncaging of ATP by  $^1\text{H}$ -decoupled  $^{31}\text{P}$  NMR spectroscopy.** Complete uncaging observed (within the limits of detection) after 30 s illumination.

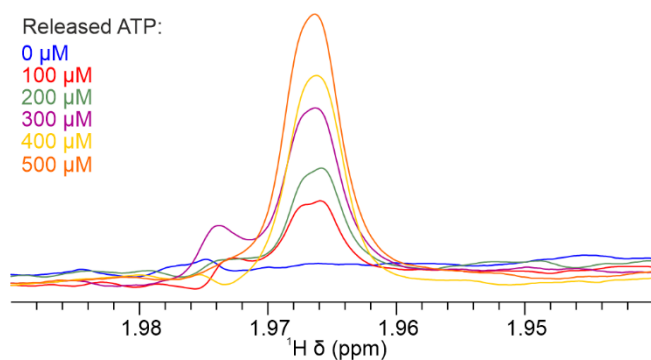

**Figure S3. Growth of acetyl phosphate methyl signal in  $^1\text{H}$  NMR following ATP release.** Signal may suffer from some distortions due to proximity to very high intensity acetate methyl signal.

### Supplementary References

1. J. E. Bramham and A. P. Golovanov, *Communications Chemistry*, 2022, **5**, 90.  
<https://doi.org/10.1038/s42004-022-00704-5>
